# Supplementary material
Source: MDPI journal article supplement (https://www.mdpi.com/2304-6740/10/2/18)
Supplement: s1 [file s1]

# Electronic Supplementary Information

## Multi-Centered Solid-Phase Quasi-Intramolecular Redox Reactions of [(Chlorido)Pentaamminecobalt(III)] Permanganate—An Easy Route to Prepare Phase Pure $\text{CoMn}_2\text{O}_4$ Spinel

Fernanda Paiva Franguelli <sup>1,2</sup>, Éva Kováts <sup>3</sup>, Zsuzsanna Czégény <sup>1</sup>, Laura Bereczki <sup>1</sup>, Vladimir M. Petruševski <sup>4</sup>, Berta Barta Holló <sup>5</sup>, Kende Attila Béres <sup>1,6</sup>, Attila Farkas <sup>7</sup>, Imre Miklós Szilágyi <sup>2</sup> and László Kótai <sup>1,8,\*</sup>

1 Research Centre for Natural Sciences, Hungarian Academy of Sciences, Magyar Tudósok krt. 2., H-1117 Budapest, Hungary; ferpaiva@gmail.com (F.P.F.); czegeny.zsuzsanna@ttk.hu (Z.C.); nagyne.bereczki.laura@ttk.hu (L.B.); beres.kende.attila@ttk.hu (K.A.B.)

2 Department of Inorganic and Analytical Chemistry, Budapest University of Technology and Economics, Műegyetem rakpart 3, H-1111 Budapest, Hungary; imre.szilagyi@mail.bme.hu

3 Wigner Research Centre for Physics (RCP), 761 Institute for Solid State Physics and Optics, Konkoly-Thege Miklós út 29-33, H-1121 Budapest, Hungary

4 Faculty of Natural Sciences and Mathematics, Ss. Cyril and Methodius University, Skopje MK-1000, North Macedonia; vladimirpetrusevski@yahoo.com

5 Department of Chemistry, Biochemistry and Environmental Protection, Faculty of Sciences, University of Novi Sad, Trg Dositeja Obradovića 3, 21000 Novi Sad, Serbia; hbarta@uns.ac.rs

6 Institute of Chemistry, ELTE Eötvös Loránd University, Pázmány Péter s. 1/A, H-1117 Budapest, Hungary

7 Department of Organic Chemistry, Budapest University of Technology and Economics, Budafoki út 8, H-1111 Budapest, Hungary; farkas.attila@mail.bme.hu

8 Deuton-X Ltd., Selmeci u. 89, H-2030 Érd, Hungary

\* Correspondence: kotai.laszlo@ttk.hu

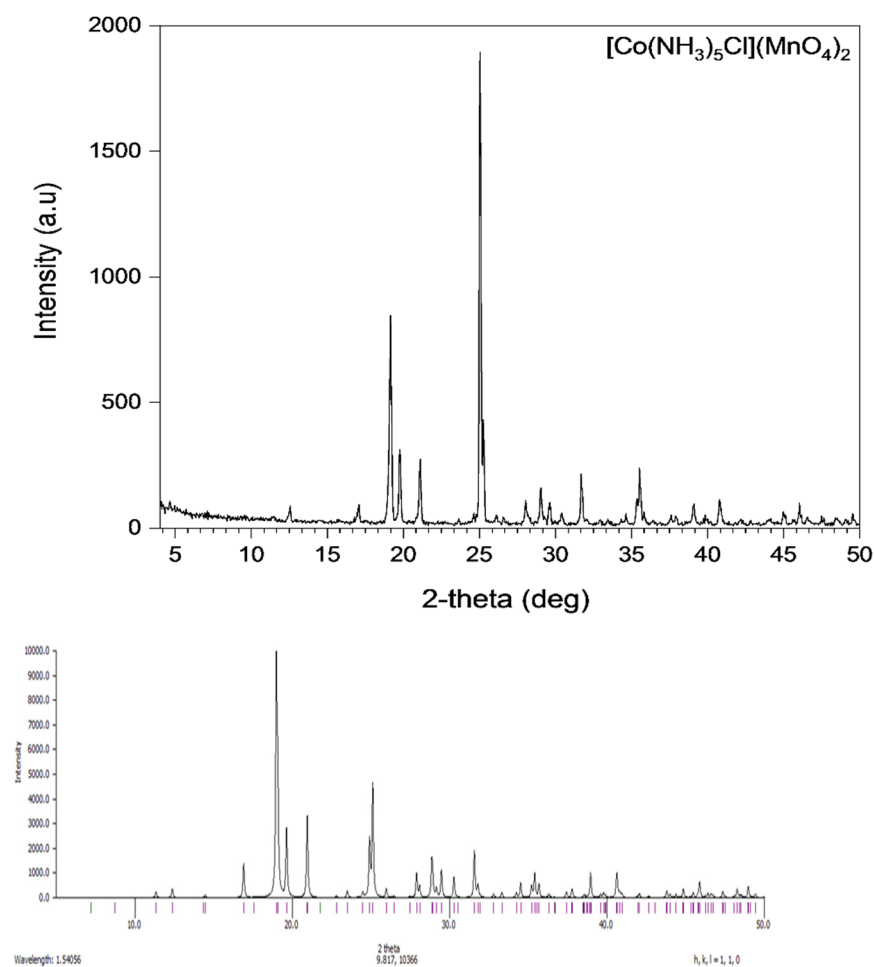

**Figure S1.** Comparison of experimental powder X-ray diffractogram and calculated one (from data of single crystal measurement) of **compound 3-Mn**.

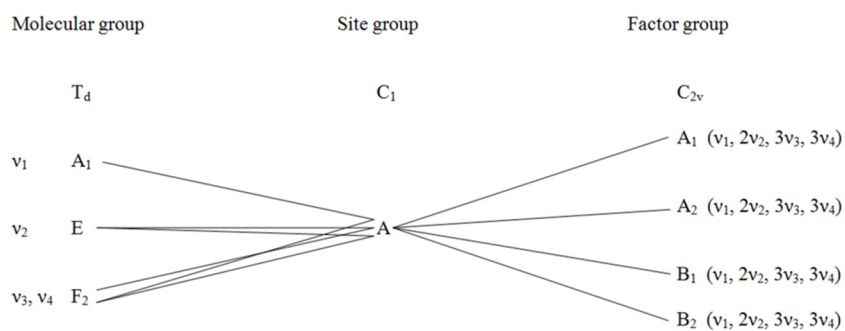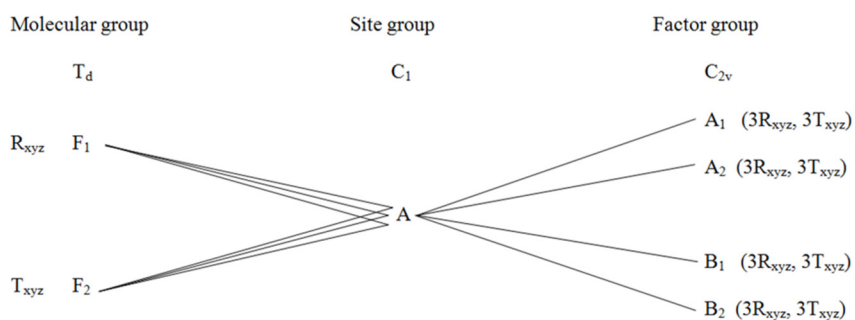

**Figure S2.** Correlation analysis for the internal and external vibrations of permanganate ion in **compound 3-Mn**.

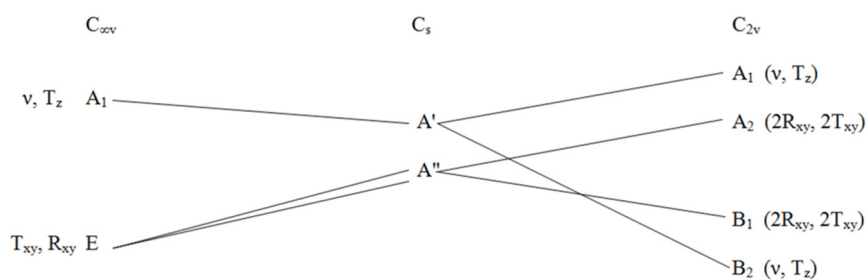

**Figure S3.** Correlation analysis for the internal and external vibrations of Co-Cl groups (molecular symmetry  $C_{\infty v}$ ) in **compound 3-Mn**.

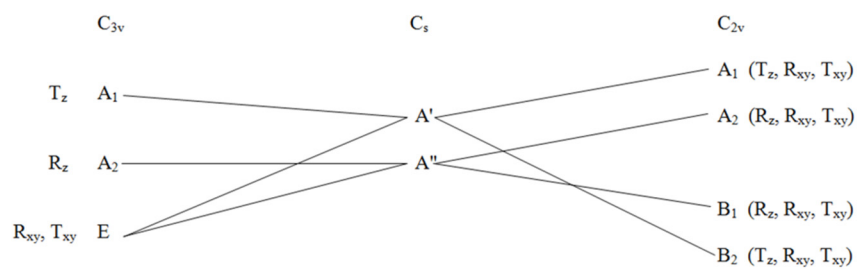

**Figure S4.** Correlation analysis for the external vibrations of ammonia ligands in **compound 3-Mn**.

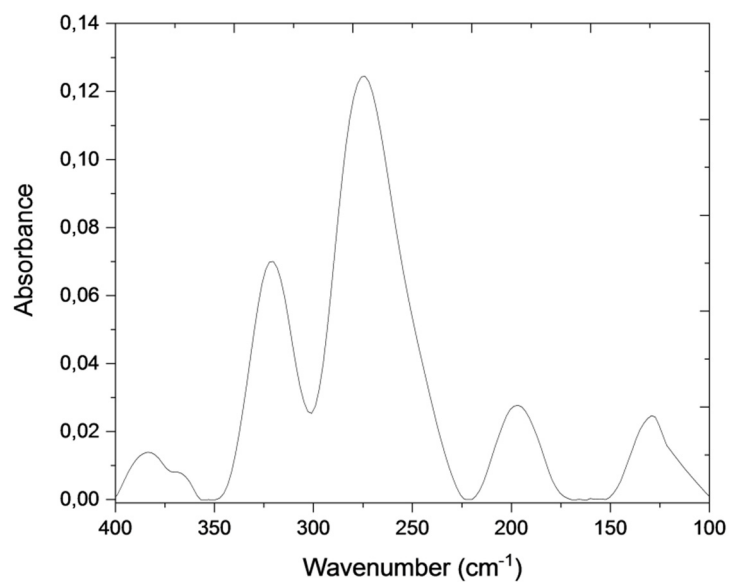

**Figure S5.** Far-IR spectrum of **compound 3-Mn** in the range of 400-100  $\text{cm}^{-1}$  at room temperature.

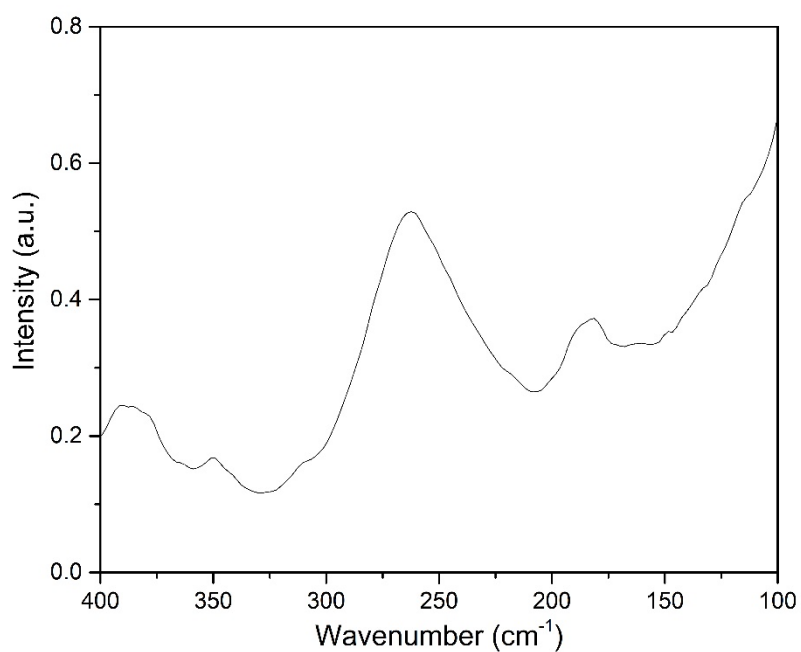

**Figure S6.** Far-IR spectrum of the deuterated **compound 3-Mn** in the range of 400-100 cm<sup>-1</sup> at room temperature.

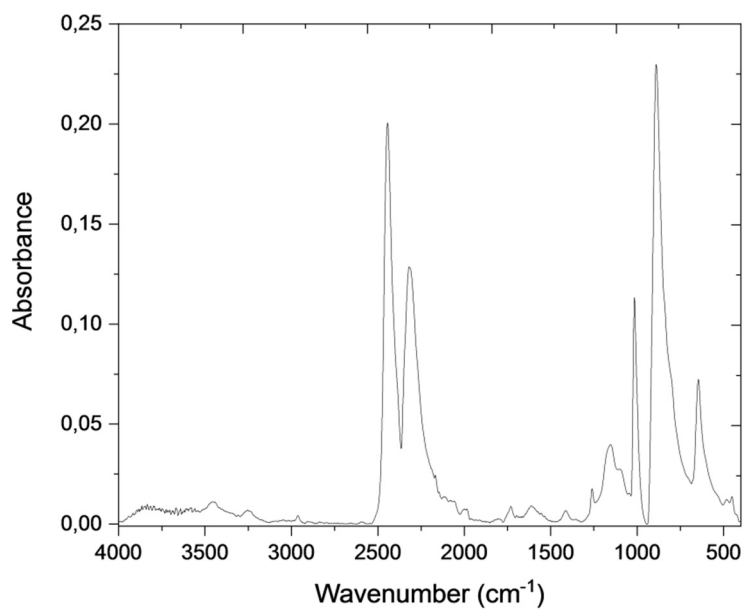

**Figure S7.** IR spectrum of the deuterated **compound 3-Mn** in the range of 4000-400 cm<sup>-1</sup> at room temperature.

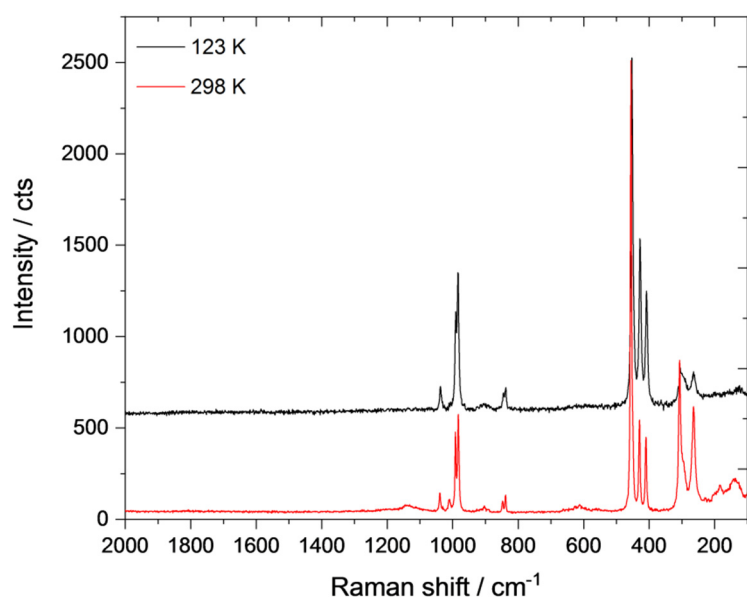

**Figure S8.** Raman spectra of the deuterated **compound 3-Mn** in the range of 1100-100 cm<sup>-1</sup> at 123 and 298 K.

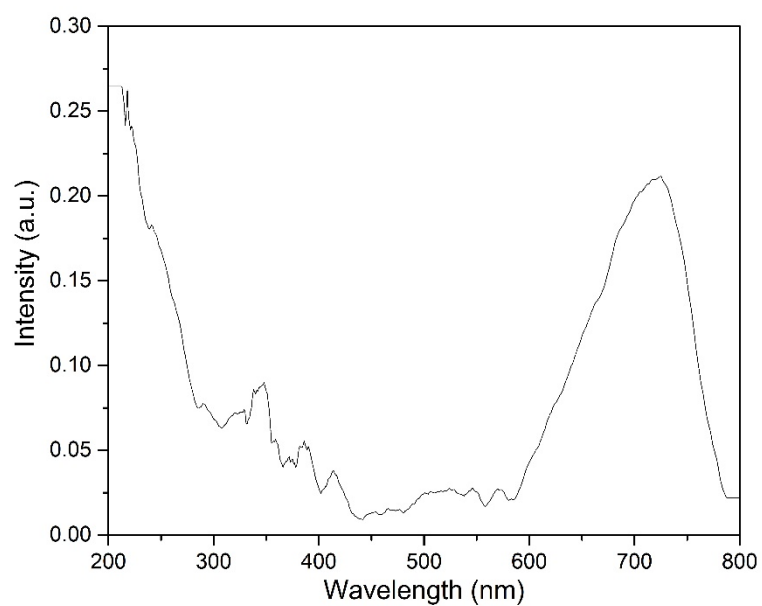

**Figure S9.** UV-VIS spectrum of **compound 3-Mn**.

(a)

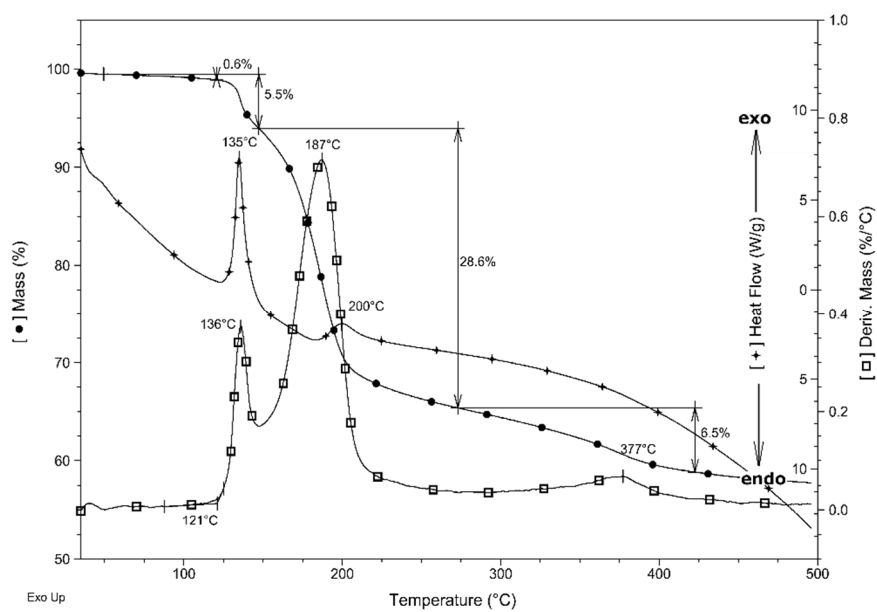

(b)

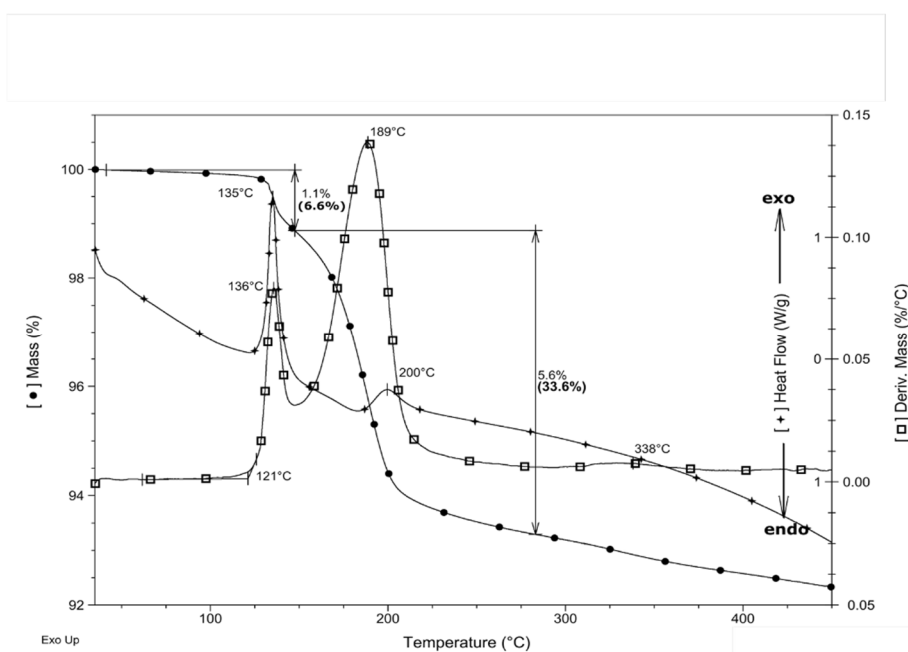

Figure S10. TG-DTG-DTA curves of compound 3-Mn in argon (a) and air (b) atmosphere.

(a)

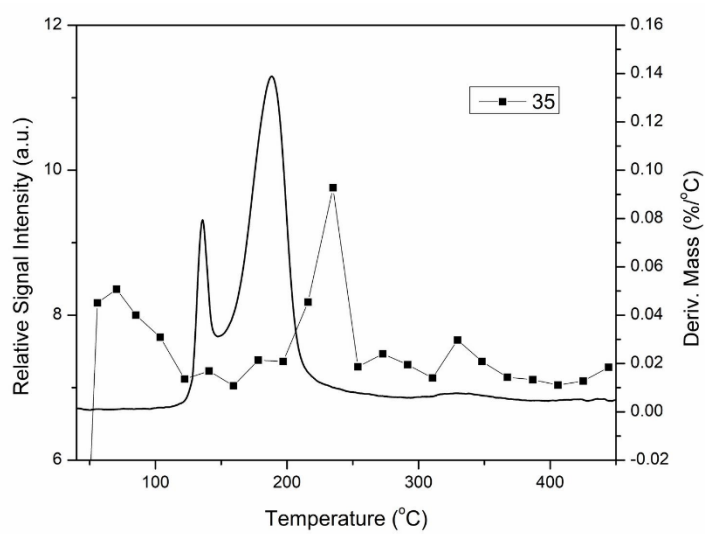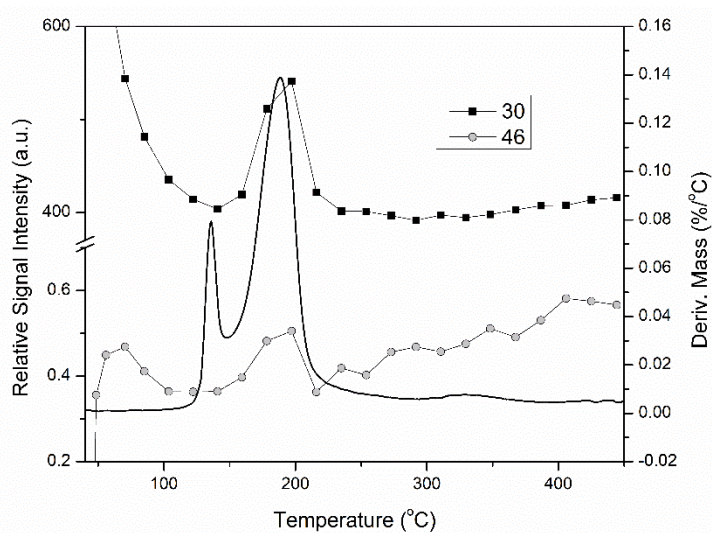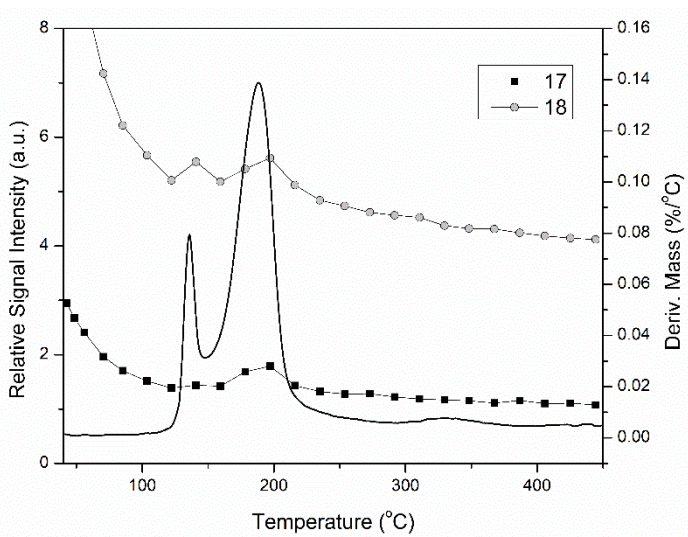



(b)

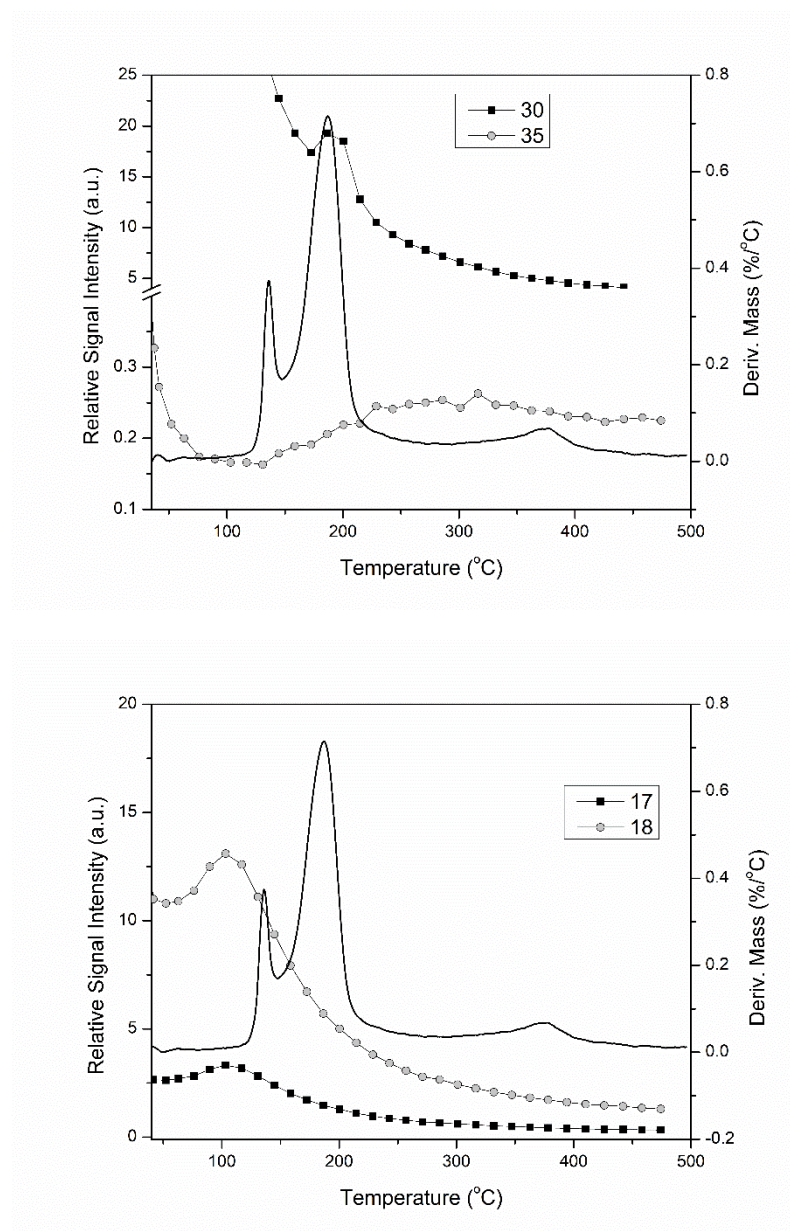

**Figure S11.** Selected TG-MS curves of **compound 3-Mn** in air (a) ( $m/z = 35$ ,  $\text{Cl}^+$ ;  $m/z = 30$  ( $\text{NO}^+$ );  $m/z = 46$ ,  $\text{NO}_2^+$ ;  $m/z = 18$ ,  $\text{H}_2\text{O}^+$ ;  $m/z = 17$   $\text{OH}^+$ ,  $\text{NH}_3^+$ ) and argon (b) atmosphere ( $m/z = 35$ ,  $\text{Cl}^+$ ;  $m/z = 30$  ( $\text{NO}^+$ );  $m/z = 18$ ,  $\text{H}_2\text{O}^+$ ;  $m/z = 17$   $\text{OH}^+$ ,  $\text{NH}_3^+$ ).

(a)

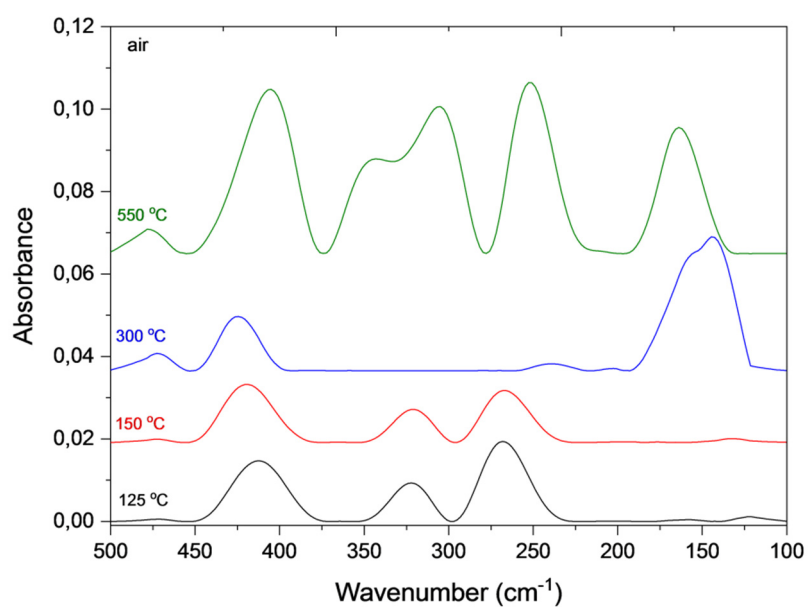

(b)

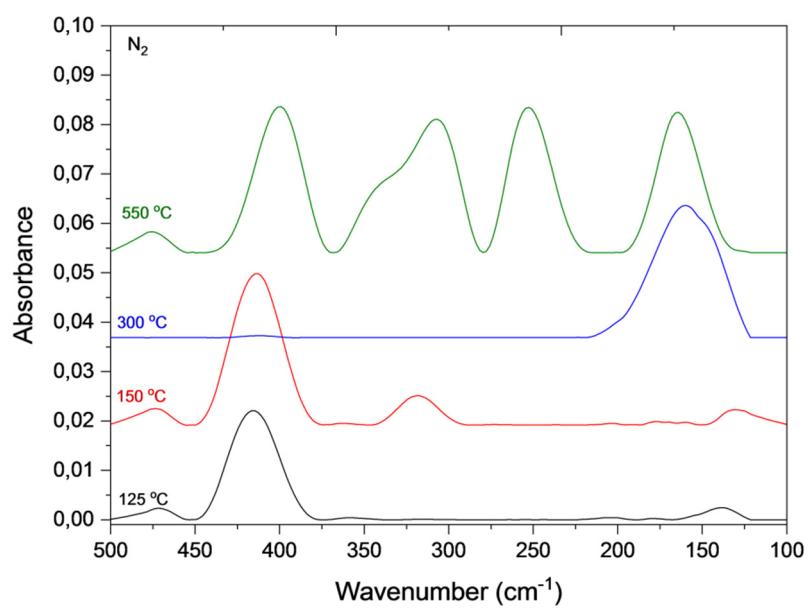

**Figure S12.** Far-IR spectra of the thermal decomposition intermediates formed from **compound 3-Mn** in air(a) and inert (b) atmosphere.

(a)

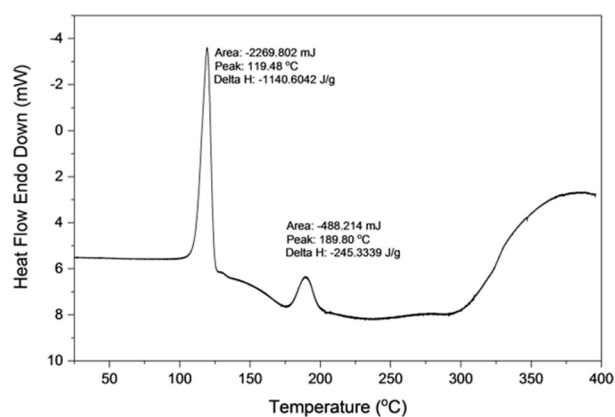

(b)

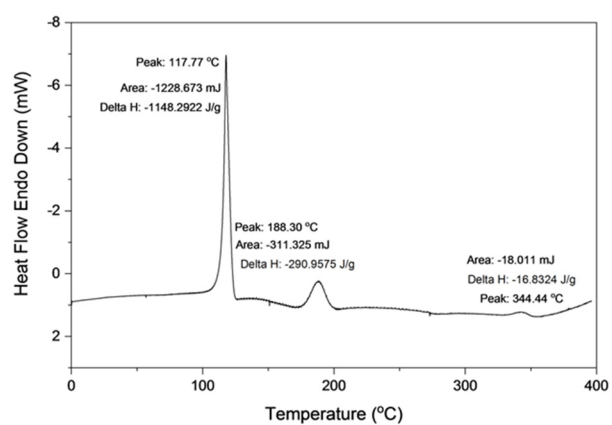

**Figure S13.** DSC analysis of **compound 3-Mn** in pure oxygen (a) and nitrogen (b).

**Table S1.** Crystal data and structure refinement of **compound 3-M**.

|                                        |                                                                                                               |
|----------------------------------------|---------------------------------------------------------------------------------------------------------------|
| Empirical formula                      | Cl Co H15 Mn2 N5 O8                                                                                           |
| Formula weight                         | 417.43                                                                                                        |
| Temperature                            | 293(2)                                                                                                        |
| Radiation and wavelength               | Mo-K $\alpha$ , $\lambda$ =0.71073 Å                                                                          |
| Crystal system                         | orthorhombic                                                                                                  |
| Space group                            | Cmc2 <sub>1</sub>                                                                                             |
| Unit cell dimensions                   | $a$ =14.2753(7) Å<br>$b$ =14.2816(6) Å<br>$c$ =12.2342(5) Å<br>$\alpha$ =90°<br>$\beta$ =90°<br>$\gamma$ =90° |
| Volume                                 | 2494.24(19) Å <sup>3</sup>                                                                                    |
| Z                                      | 8                                                                                                             |
| Density (calculated)                   | 2.216 Mg/m <sup>3</sup>                                                                                       |
| Absorption coefficient, $\mu$          | 3.558 mm <sup>-1</sup>                                                                                        |
| $F(000)$                               | 1653                                                                                                          |
| Crystal colour                         | clear dark violet                                                                                             |
| Crystal description                    | needle                                                                                                        |
| Crystal size                           | 0.5 x 0.1 x 0.05 mm                                                                                           |
| Absorption correction                  | multi-scan                                                                                                    |
| Max. transmission                      | 0.53659                                                                                                       |
| Min. transmission                      | 1.00000                                                                                                       |
| $\theta$ -range for data collection    | $3.303 \leq \theta \leq 33.201^\circ$                                                                         |
| Index ranges                           | $-20 \leq h \leq 21$ ; $-21 \leq k \leq 21$ ; $-18 \leq l \leq 17$                                            |
| Reflections collected                  | 24215                                                                                                         |
| Completeness to $2\theta$              | 0.997                                                                                                         |
| Independent reflections                | 4623 [ $R(\text{int})$ =0.0571]                                                                               |
| Reflections $I > 2\sigma(I)$           | 3848                                                                                                          |
| Refinement method                      | full-matrix least-squares on $F^2$                                                                            |
| Data / restraints / parameters         | 4623 /1 /173                                                                                                  |
| Goodness-of-fit on $F^2$               | 1.067                                                                                                         |
| Final $R$ indices [ $I > 2\sigma(I)$ ] | $R1$ =0.0395, $wR2$ =0.0746                                                                                   |
| $R$ indices (all data)                 | $R1$ =0.0567, $wR2$ =0.0867                                                                                   |
| Max. and mean shift/esd                | 0.000;0.000                                                                                                   |
| Largest diff. peak and hole            | 0.744;-0.743 e.Å <sup>-3</sup>                                                                                |

**Table S2.** Bond lengths (Å) and angles (°) in **compound 3-Mn**.

|              |          |               |          |
|--------------|----------|---------------|----------|
| Co1-N2       | 1.955(6) | Co1-N3#1      | 1.964(4) |
| Co1-N3       | 1.964(4) | Co1-N1        | 1.965(4) |
| Co1-N1#1     | 1.965(4) | Co1-Cl1       | 2.258(2) |
| Co2-N6       | 1.950(4) | Co2-N6#1      | 1.950(4) |
| Co2-N4       | 1.957(5) | Co2-N5        | 1.960(6) |
| Co2-N7       | 1.964(6) | Co2-Cl2       | 2.255(2) |
| Mn1-O3       | 1.597(4) | Mn1-O1        | 1.601(5) |
| Mn1-O4       | 1.602(5) | Mn1-O2        | 1.604(5) |
| Mn2-O7       | 1.582(5) | Mn2-O5        | 1.589(5) |
| Mn2-O6       | 1.590(6) | Mn2-O8        | 1.595(5) |
|              |          |               |          |
| N2-Co1-N3#1  | 89.0(2)  | N2-Co1-N3     | 89.0(2)  |
| N3#1-Co1-N3  | 90.7(3)  | N2-Co1-N1     | 92.7(2)  |
| N3#1-Co1-N1  | 89.7(2)  | N3-Co1-N1     | 178.2(2) |
| N2-Co1-N1#1  | 92.7(2)  | N3#1-Co1-N1#1 | 178.2(2) |
| N3-Co1-N1#1  | 89.7(2)  | N1-Co1-N1#1   | 90.0(3)  |
| N2-Co1-Cl1   | 179.4(2) | N3#1-Co1-Cl1  | 90.5(1)  |
| N3-Co1-Cl1   | 90.5(1)  | N1-Co1-Cl1    | 87.7(1)  |
| N1#1-Co1-Cl1 | 87.7(1)  | N6-Co2-N6#1   | 179.6(3) |
| N6-Co2-N4    | 90.0(2)  | N6#1-Co2-N4   | 90.0(2)  |
| N6-Co2-N5    | 90.2(2)  | N6#1-Co2-N5   | 90.2(2)  |
| N4-Co2-N5    | 92.1(3)  | N6-Co2-N7     | 90.0(2)  |
| N6#1-Co2-N7  | 90.0(2)  | N4-Co2-N7     | 178.6(3) |
| N5-Co2-N7    | 89.3(3)  | N6-Co2-Cl2    | 89.8(2)  |
| N6#1-Co2-Cl2 | 89.8(2)  | N4-Co2-Cl2    | 88.9(2)  |
| N5-Co2-Cl2   | 179.0(2) | N7-Co2-Cl2    | 89.7(2)  |
| O3-Mn1-O1    | 109.9(3) | O3-Mn1-O4     | 110.5(3) |
| O1-Mn1-O4    | 109.9(3) | O3-Mn1-O2     | 108.2(3) |
| O1-Mn1-O2    | 109.3(3) | O4-Mn1-O2     | 109.0(3) |
| O7-Mn2-O5    | 109.8(4) | O7-Mn2-O6     | 110.2(4) |
| O5-Mn2-O6    | 107.0(3) | O7-Mn2-O8     | 111.2(3) |
| O5-Mn2-O8    | 112.0(4) | O6-Mn2-O8     | 106.7(3) |

Symmetry codes to generate equivalent atoms: 1. [4\_655] -x+1,y,z.

**Table S3.** Analysis of Potential Hydrogen Bonds and Schemes with  $d(D...A) < R(D)+R(A)+0.50$ ,  $d(H...A) < R(H)+R(A)-0.12$  Ang.,  $D-H...A > 100.0$  Deg in the crystal of  $[Co(NH_3)_5Cl](MnO_4)_2$  (distances are given in Å).

| Nr | Typ Res | Donor | H.... | Acceptor | Symm. op.           | D - H | H...A | D...A    | D - H...A |
|----|---------|-------|-------|----------|---------------------|-------|-------|----------|-----------|
| 1  | 1       | N1    | --H1A | ..Cl2    | $x,y,-1+z$          | 0.89  | 2.74  | 3.603(5) | 164°      |
| 3  | 1       | N1    | --H1B | ..O2     | $1/2+x,1/2-y,1/2+z$ | 0.89  | 2.23  | 3.104(6) | 165°      |
| 4  | 1       | N1    | --H1C | ..O8     | $x,y,z$             | 0.89  | 2.05  | 2.932(8) | 169°      |
| 5  | 1       | N2    | --H2A | ..Cl1    | $1-x,1-y,1/2+z$     | 0.89  | 2.53  | 3.361(6) | 156°      |
| 7  | 1       | N2    | --H2B | ..O8     | $1-x,y,z$           | 0.89  | 2.05  | 2.894(7) | 158°      |
| 8  | 1       | N2    | --H2C | ..O8     | $x,y,z$             | 0.89  | 2.10  | 2.894(7) | 148°      |
| 9  | 1       | N3    | --H3A | ..Cl2    | $1-x,1-y,-1/2+z$    | 0.89  | 2.64  | 3.512(5) | 165°      |
| 11 | 1       | N3    | --H3B | ..O2     | $1/2+x,1/2+y,z$     | 0.89  | 2.27  | 3.065(6) | 148°      |
| 12 | 1       | N3    | --H3B | ..O3     | $1/2+x,1/2+y,z$     | 0.89  | 2.46  | 3.234(6) | 145°      |
| 13 | 1       | N3    | --H3C | ..O1     | $1/2-x,1/2+y,z$     | 0.89  | 2.14  | 3.024(7) | 173°      |
| 14 | 2       | N4    | --H4A | ..O3     | $1/2-x,1/2-y,1/2+z$ | 0.89  | 2.33  | 3.046(5) | 138°      |
| 15 | 2       | N4    | --H4B | ..O7     | $x,y,z$             | 0.89  | 2.02  | 2.860(8) | 157°      |
| 16 | 2       | N4    | --H4B | ..O7     | $1-x,y,z$           | 0.89  | 2.47  | 2.860(8) | 107°      |
| 17 | 2       | N4    | --H4C | ..O7     | $1-x,y,z$           | 0.89  | 2.56  | 2.860(8) | 101°      |
| 18 | 2       | N4    | --H4C | ..O3     | $1/2-x,1/2+y,z$     | 0.89  | 2.18  | 3.046(5) | 163°      |
| 19 | 2       | N5    | --H5A | ..O7     | $1-x,y,z$           | 0.89  | 2.19  | 3.022(8) | 156°      |
| 20 | 2       | N5    | --H5B | ..O5     | $1-x,-y,1/2+z$      | 0.89  | 2.63  | 3.226(8) | 125°      |
| 21 | 2       | N5    | --H5C | ..O5     | $1-x,-y,1/2+z$      | 0.89  | 2.42  | 3.226(8) | 151°      |
| 22 | Intra 2 | N6    | --H6A | ..Cl2    |                     | 0.89  | 2.65  | 2.975(5) | 103°      |
| 23 | 2       | N6    | --H6B | ..O1     | $x,y,1+z$           | 0.89  | 2.47  | 3.079(8) | 126°      |
| 24 | 2       | N6    | --H6B | ..O5     | $x,-y,1/2+z$        | 0.89  | 2.18  | 3.007(7) | 153°      |
| 25 | 2       | N6    | --H6C | ..O3     | $1/2-x,1/2-y,1/2+z$ | 0.89  | 2.56  | 3.005(7) | 111°      |
| 26 | 2       | N7    | --H7A | ..O5     | $1-x,-y,1/2+z$      | 0.89  | 2.44  | 3.017(8) | 123°      |
| 27 | 2       | N7    | --H7A | ..O4     | $1-x,y,1+z$         | 0.89  | 2.35  | 2.960(8) | 126°      |
| 28 | 2       | N7    | --H7B | ..O5     | $x,-y,1/2+z$        | 0.89  | 2.24  | 3.017(8) | 145°      |
| 29 | 2       | N7    | --H7C | ..O4     | $x,y,1+z$           | 0.89  | 2.10  | 2.960(8) | 161°      |

## **References**

<sup>1</sup> *CrysAlisPRO, Oxford Diffraction /Agilent Technologies UK Ltd, Yarnton, England.*

<sup>2</sup> *G. M. Sheldrick, Acta Crystallogr., Sect. A: Found. Crystallogr., 2008, 64, 112–122.*

<sup>3</sup> *O. V. Dolomanov, L. J. Bourhis, R. J. Gildea, J. A. K. Howard and H. Puschmann, J. Appl. Crystallogr., 2009, 42, 339–341.*
